# Supplementary material
Source: Springer Nature journal article supplement (https://www.springermedizin.de/resource/supplementary/13041_2009_52_MOESM5_ESM.pdf/25657418)

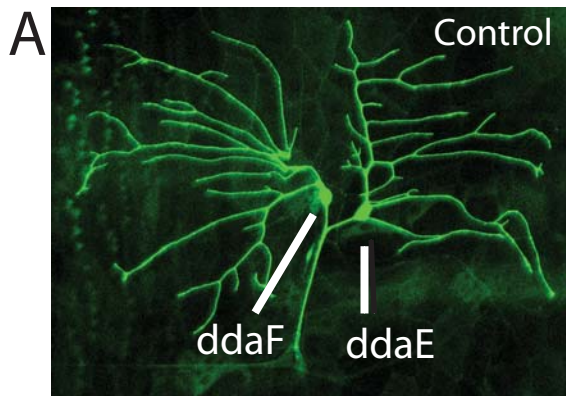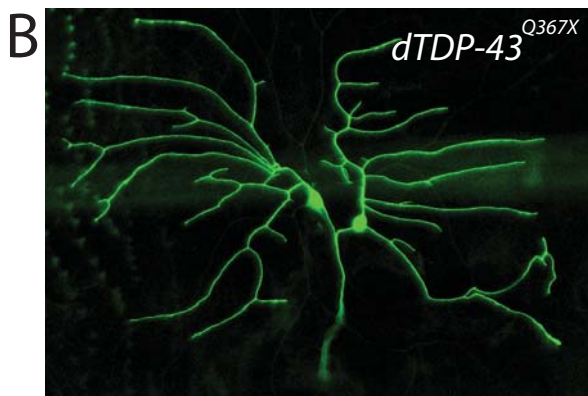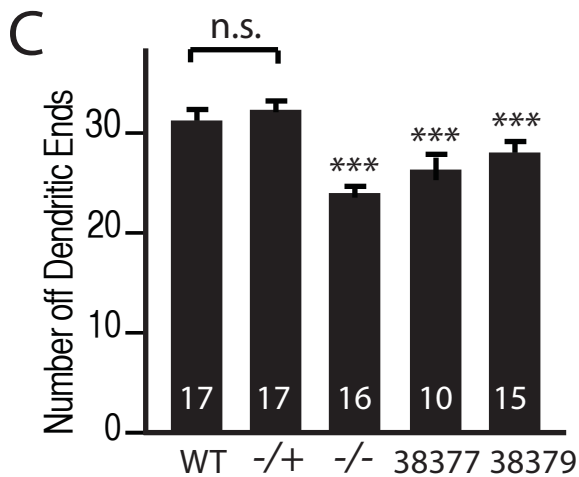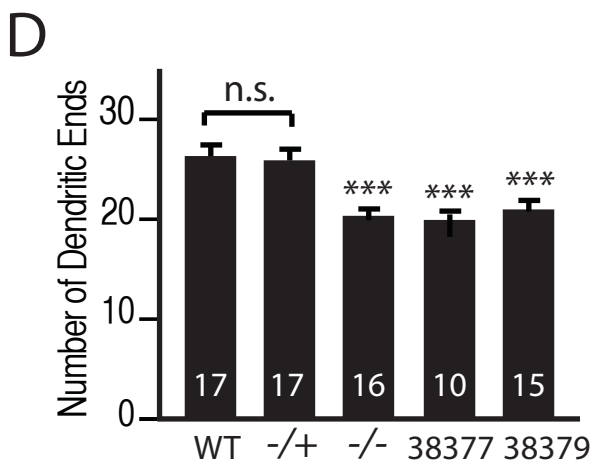

Supplement: MOESM5 [file 25657418]
